# Supplementary material for: Women-oriented Evaluation of Perceived Safety of Walking Routes Between Home and Mass Transit: A Case Study and Methodology Test in Guangzhou
Source: Preprints.org preprint supplement (doi:10.20944/preprints202303.0104.v1), 2023-03-06
Supplement: Supplementary file 1 [file supplementary]

| 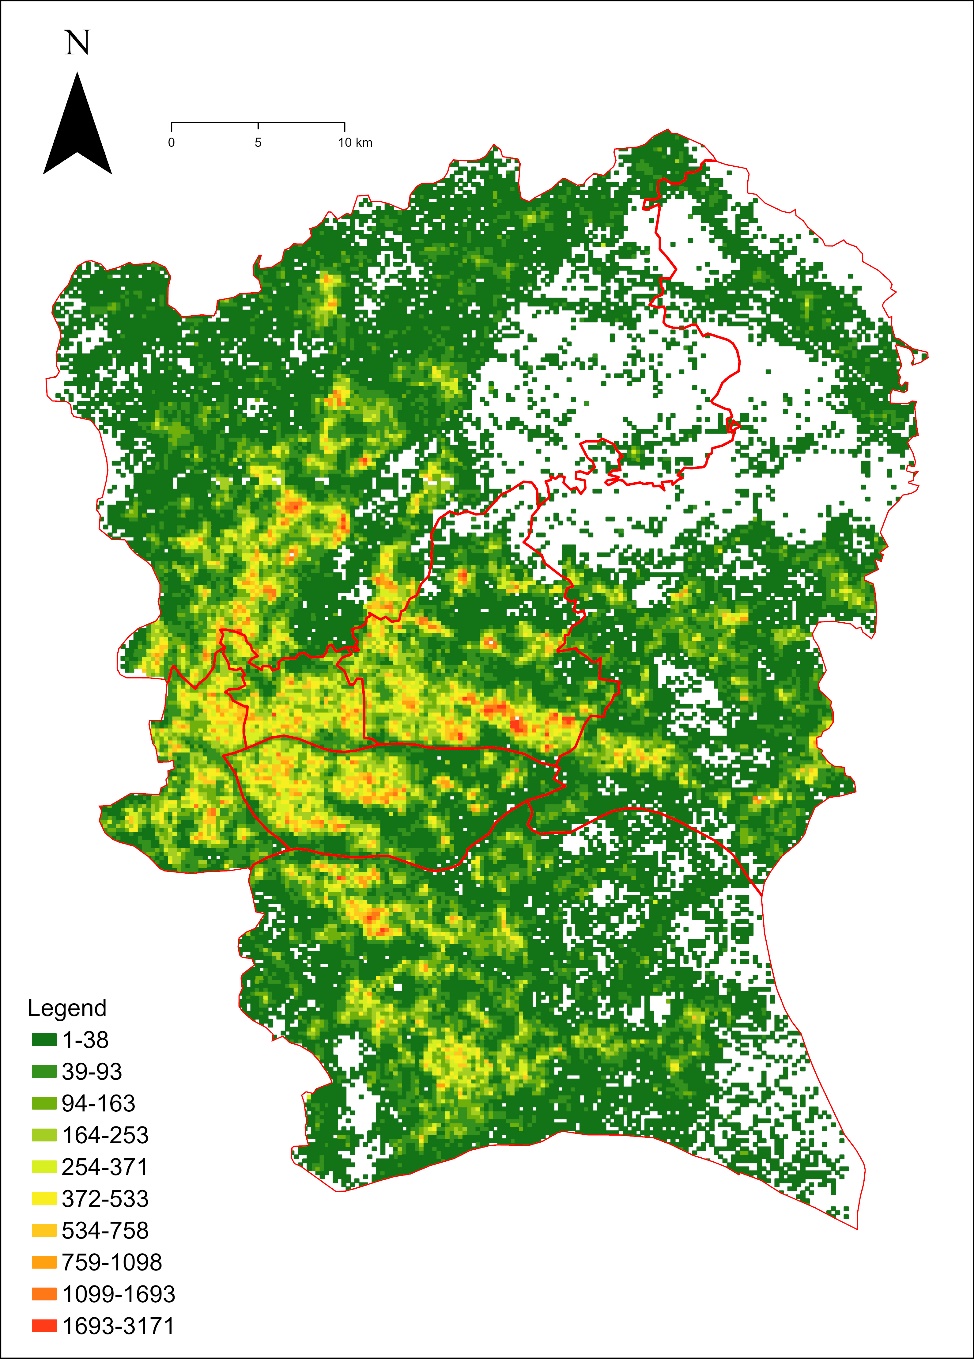 | 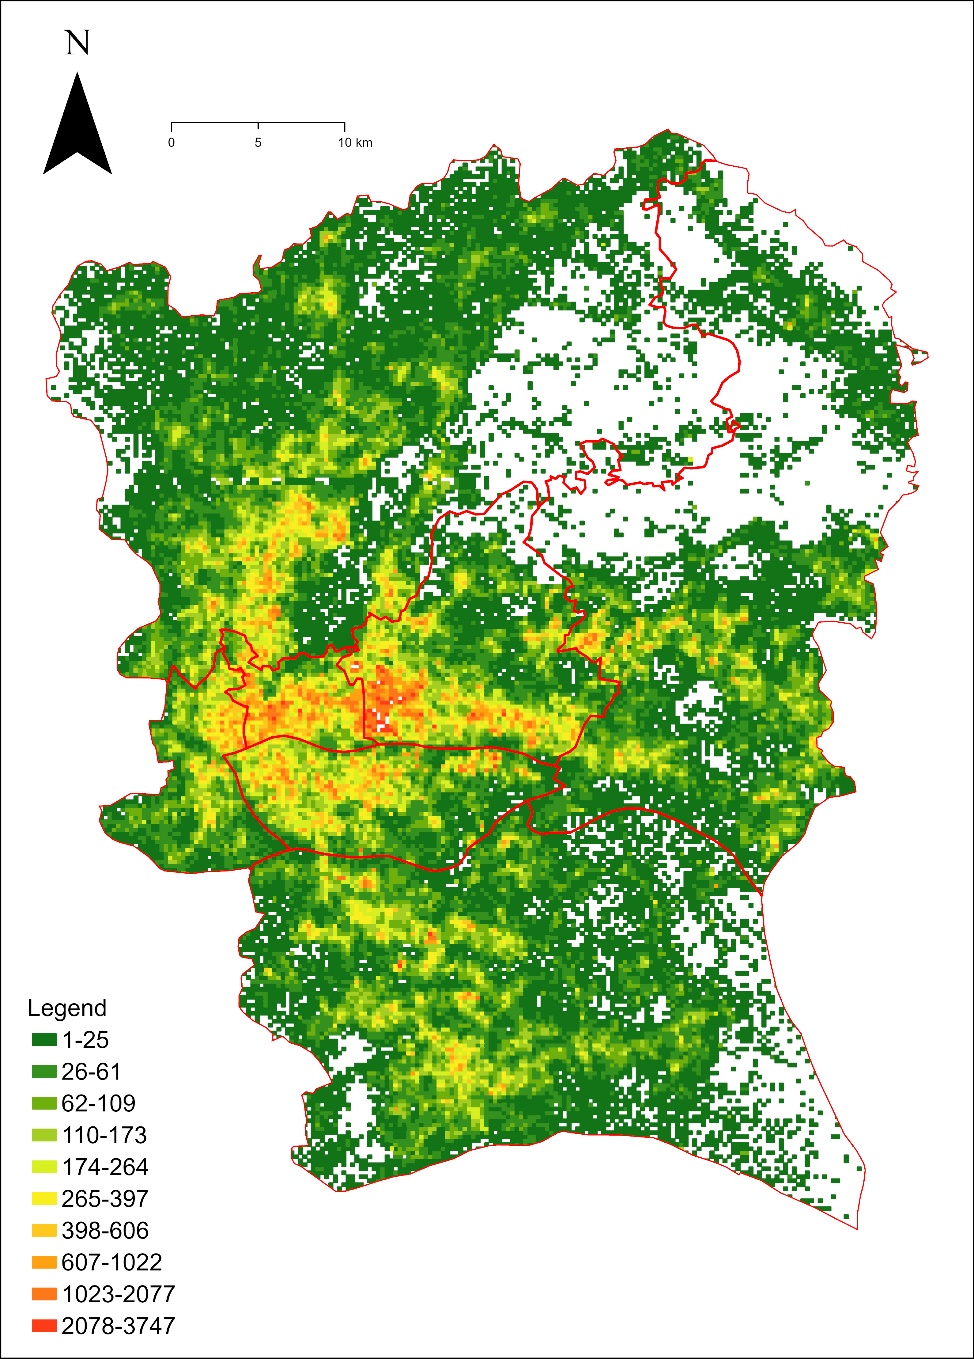 |
| --- | --- |
| (**a**) | (**b**) |

**Figure S1.** Results of the grid aggregated mobile phone data: (a) summary of the number of women living in the grid; (b) summary of the number of women working in the grid.

| 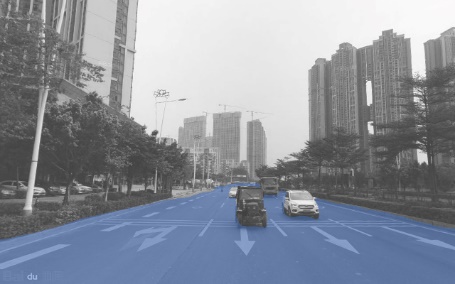Road | 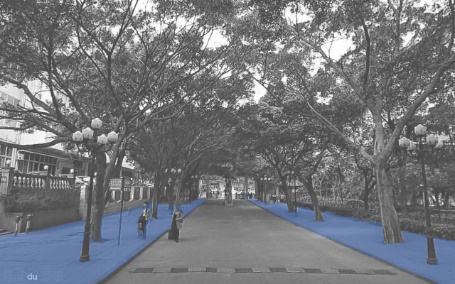Sidewalk | 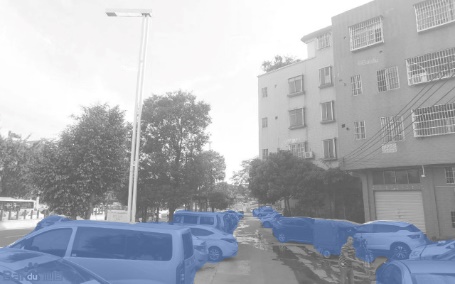Car | 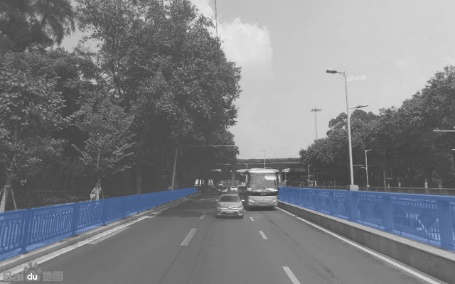Rail | 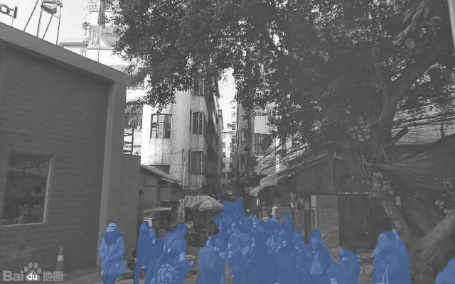Person |
| --- | --- | --- | --- | --- |
| 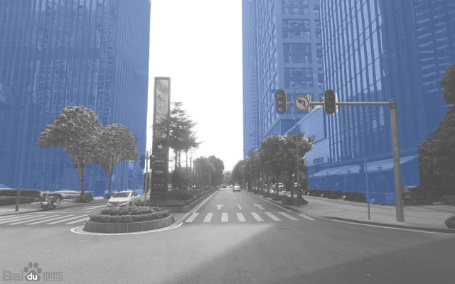Skyscraper | 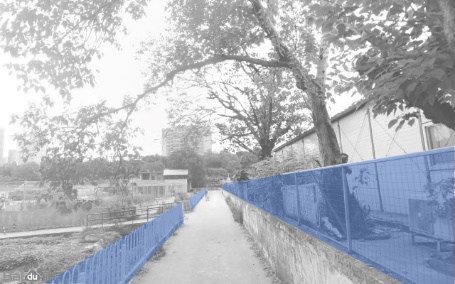Fence | 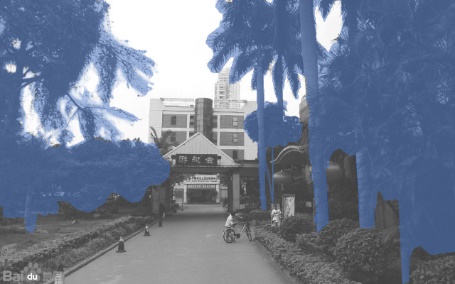Tree | 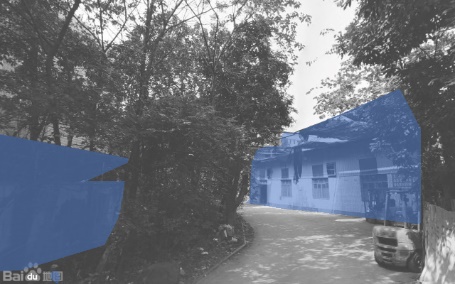House | 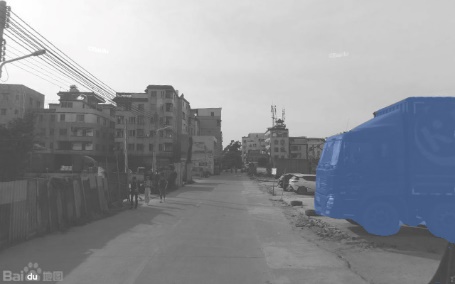Truck |
| 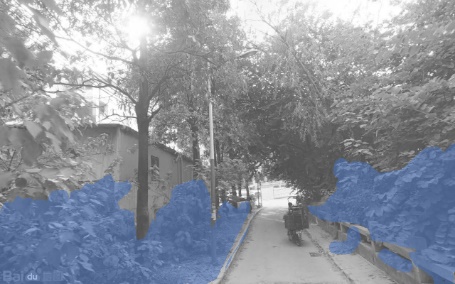Plant | 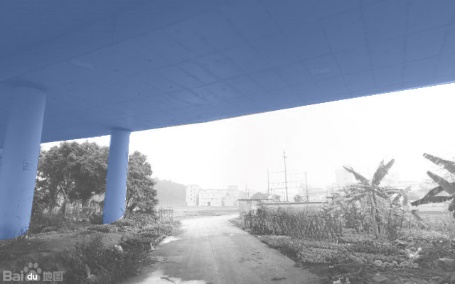Tunnel | 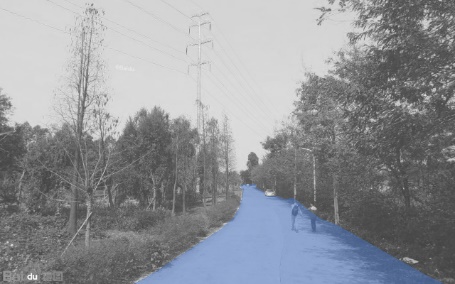Path | 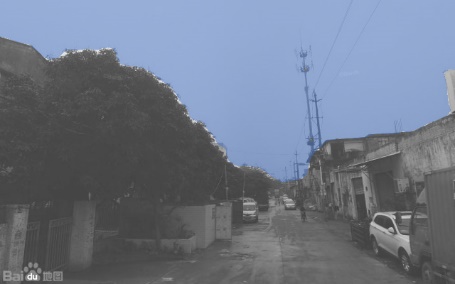Sky | 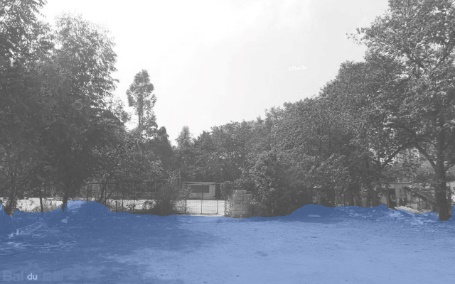Ground |

**Figure S2.** Fifteen visual elements that affect perceived safety.

**Table S1**. Volunteer demographic information.

| **Group** | **Description** |
| --- | --- |
| #1 | 20 women, 16 of whom are students and 4 of whom are staff; age range 19 - 48. |
| #2 | 10 women and 10 men, 8 of whom are women students and 2 of whom are women staff, the same applies to men; age range 18 - 50. |
| #3 | 10 men, 8 of whom are students and 2 of whom are staff; age range 20 - 53. |

**Table S2**. Statistical description of features extracted by Semantic segmentation sorted by mean.

| **FID** | **Label** | **Number of images[[1]](#footnote-1)** | **Mean[[2]](#footnote-2)** | **Std.2** | **Min** | **Max** |
| --- | --- | --- | --- | --- | --- | --- |
| 1 | Sky | 165,734 | 26.03% | 16.37% | 0.00% | 77.26% |
| 2 | Tree | 160,034 | 23.94% | 17.85% | 0.00% | 91.86% |
| 3 | Building | 158,985 | 16.68% | 17.71% | 0.00% | 92.24% |
| 4 | Road | 161,936 | 14.11% | 7.81% | 0.00% | 57.44% |
| 5 | Unknown objects | 165,312 | 4.05% | 5.12% | 0.00% | 48.04% |
| 6 | Car | 142,345 | 3.00% | 3.91% | 0.00% | 29.75% |
| 7 | Sidewalk | 148,635 | 2.81% | 3.55% | 0.00% | 41.25% |
| 8 | Wall | 108,003 | 1.53% | 3.52% | 0.00% | 39.52% |
| 9 | Plant | 105,019 | 1.46% | 2.70% | 0.00% | 30.41% |
| 10 | Grass | 89,403 | 1.12% | 2.30% | 0.00% | 30.24% |
| 11 | Fence | 97,347 | 0.94% | 1.81% | 0.00% | 20.79% |
| 12 | Ground | 69,970 | 0.62% | 1.85% | 0.00% | 42.64% |
| 13 | Ceiling | 11,826 | 0.55% | 3.72% | 0.00% | 58.98% |
| 14 | Bridge | 28,795 | 0.32% | 1.62% | 0.00% | 44.85% |
| 15 | Truck | 34,996 | 0.28% | 1.30% | 0.00% | 32.77% |
| 16 | Signboard | 80,321 | 0.27% | 0.72% | 0.00% | 21.29% |
| 17 | Person | 69,339 | 0.23% | 0.68% | 0.00% | 22.81% |
| 18 | Bus | 21,358 | 0.20% | 1.24% | 0.00% | 37.92% |
| 19 | Rail | 32,861 | 0.17% | 0.69% | 0.00% | 17.40% |
| 20 | Skyscraper | 6,121 | 0.15% | 1.27% | 0.00% | 49.15% |
| 21 | Path | 18,222 | 0.15% | 0.92% | 0.00% | 26.92% |
| 22 | Floor | 19,024 | 0.14% | 0.98% | 0.00% | 51.34% |
| 23 | Van | 28,575 | 0.12% | 0.57% | 0.00% | 17.18% |
| 24 | Mountain | 15,079 | 0.09% | 0.71% | 0.00% | 30.69% |
| 25 | House | 10,859 | 0.07% | 0.76% | 0.00% | 59.45% |
| 26 | Water | 10,596 | 0.07% | 0.61% | 0.00% | 24.05% |
| 27 | Tower | 7,861 | 0.06% | 0.63% | 0.00% | 48.10% |
| 28 | Window | 6,654 | 0.06% | 0.57% | 0.00% | 23.93% |
| 29 | Pole | 34,110 | 0.05% | 0.19% | 0.00% | 3.00% |
| 30 | Motorbike | 16,776 | 0.05% | 0.26% | 0.00% | 13.53% |
| 31 | Bike | 14,673 | 0.04% | 0.28% | 0.00% | 17.57% |
| 32 | Sunblind | 10,174 | 0.04% | 0.28% | 0.00% | 12.87% |

1. Number of SVIs with at least one pixel label in the category. [↑](#footnote-ref-1)
2. The mean/std value was calculated based on all 166,015 images. [↑](#footnote-ref-2)
